# Supplementary material for: An aggregation-induced emission enhancement fluorescent benzoxazine-derived macromolecule: catalyst-free synthesis and its preliminary application for the determination of aqueous picric acid
Source: Royal Society of Chemistry journal article supplement (doi:10.1039/c6ra06942h), 2016-01-01
Supplement: c6ra06942h1.pdf [file c6ra06942h1.pdf]

## Supporting Information

### **AIEE-type fluorescent benzoxazine-derivatived macromolecule: catalyst-free synthesis and its preliminary application for aqueous picric acid detection**

Yue Su <sup>a,b</sup>, Wei Shi <sup>b\*</sup>, Xin Chen <sup>b</sup>, Shiyu Zhao <sup>a</sup>, Yonghai Hui <sup>a\*</sup>, Zhengfeng Xie <sup>b</sup>

<sup>a</sup> *Key Laboratory of Petroleum and Gas Fine Chemicals, Educational Ministry of China, School of Chemistry and Chemical Engineering, Xinjiang University, Urumqi 830046, P. R. China*

<sup>b</sup> *Oil & Gas Field Applied Chemistry Key Laboratory of Sichuan Province, School of Chemistry and Chemical Engineering, Southwest Petroleum University, Chengdu, 610500, P. R. China*

\* corresponding author: Tel: +86 028 83037306; fax: +86 028 83037305

*E-mail address:* [shiwei80@swpu.edu.cn](mailto:shiwei80@swpu.edu.cn), [xjuwshi@gmail.com](mailto:xjuwshi@gmail.com) (W Shi)

[hyhai97@126.com](mailto:hyhai97@126.com) (YH Hui)

## Table and Figure Captions

**Table S1** Calculated HOMO/LUMO values of **TPE-BOZ** and other analytes.

**Table S2** Summarization about reported macromolecules-based fluorescence probes for PA.

**Fig. S1**  $^1\text{H}$  NMR spectrum of **M3** in  $\text{CDCl}_3$ .

**Fig. S2**  $^{13}\text{C}$  NMR spectrum of **M3** in  $\text{CDCl}_3$ .

**Fig. S3** FT-IR spectrum of **M3**.

**Fig. S4**  $^1\text{H}$  NMR spectra of PEA (a) and **TPE-BOZ** (b) in  $\text{CDCl}_3$ .

**Fig. S5** FT-IR spectra of PEA (a) and **TPE-BOZ** (b).

**Fig. S6** TOF-MS of **TPE-BOZ**.

**Fig. S7** SEM of **TPE-BOZ** ( $1 \times 10^{-5}$  M) in EtOH/water (v/v=1/9) co-solvent system.

**Fig. S8** UV spectra of **TPE-BOZ** ( $1.0 \times 10^{-5}$  M) in EtOH/water mixtures with different fractions of water.

**Fig. S9** Fluorescence quenching of **TPE-BOZ** by PA under different  $\lambda_{\text{ex}}$ .

**Fig.S10** Visual photographs of **TPE-BOZ** adsorbed on a TLC plate (a) and with a spot of water (b) and PA solution ( $10^{-3}\text{M}$ ) (c) under hand-held UV lamp (365 nm).

**Table S1.** Calculated HOMO/LUMO values of **TPE-BOZ** and other analytes.

|      | <b>TPE-BOZ</b> | PA    | DNP   | PNP   | ONP   | PNT   | NB    | NM    | PhOH  |
|------|----------------|-------|-------|-------|-------|-------|-------|-------|-------|
| HOMO | -4.90          | -8.59 | -7.91 | -7.16 | -7.02 | -7.50 | -7.74 | -8.35 | -6.14 |
| LUMO | -1.32          | -4.19 | -3.56 | -2.45 | -2.93 | -2.50 | -2.62 | -2.16 | -0.08 |

**Table S2** Summarization about reported macromolecules-based fluorescence probes for PA.

| <b>Probing platform</b>                          | <b>Detection limit</b>      | <b>Detection medium</b>                     | <b>Catalyst utilized in preparation</b>            | <b>Synthetic time</b> | <b>References</b> |
|--------------------------------------------------|-----------------------------|---------------------------------------------|----------------------------------------------------|-----------------------|-------------------|
| Urotropine-MOF                                   | $\sim 7.1 \times 10^{-6}$ M | water                                       | Free                                               | 24h                   | [52]              |
| Triphenylamine-based analogous carboxylic acid   | $1.14 \times 10^{-6}$ M     | CHCl <sub>3</sub> /DMAC                     | CuI                                                | >24h                  | [53]              |
| Biphenyl-containing hexaphenylbenzene derivative | $1.57 \times 10^{-6}$ M     | V <sub>water</sub> /V <sub>THF</sub> = 4/6  | Pd(PPh <sub>3</sub> ) <sub>2</sub> Cl <sub>2</sub> | >24h                  | [54]              |
| Thiophene-containing pentacenequinone derivative | $1.5 \times 10^{-8}$ M      | V <sub>water</sub> /V <sub>THF</sub> = 9/1  | Pd(PPh <sub>3</sub> ) <sub>4</sub>                 | >24h                  | [55]              |
| Hexa-peri-hexabenzocoronene-based derivatives    | $4 \times 10^{-9}$ M        | V <sub>water</sub> /V <sub>THF</sub> = 4/6  | Pd(PPh <sub>3</sub> ) <sub>2</sub> Cl <sub>2</sub> | >12h                  | [56]              |
| TPE-containing hyperbranched polytriazoles       | $4.5 \times 10^{-5}$ M      | V <sub>water</sub> /V <sub>THF</sub> = 9/1  | Cu(PPh <sub>3</sub> ) <sub>3</sub> Br              | 7h                    | [48]              |
| TPE-based benzoxazine macromolecules             | $4.7 \times 10^{-9}$ M      | V <sub>water</sub> /V <sub>EtOH</sub> = 9/1 | Free                                               | 6h                    | This work         |

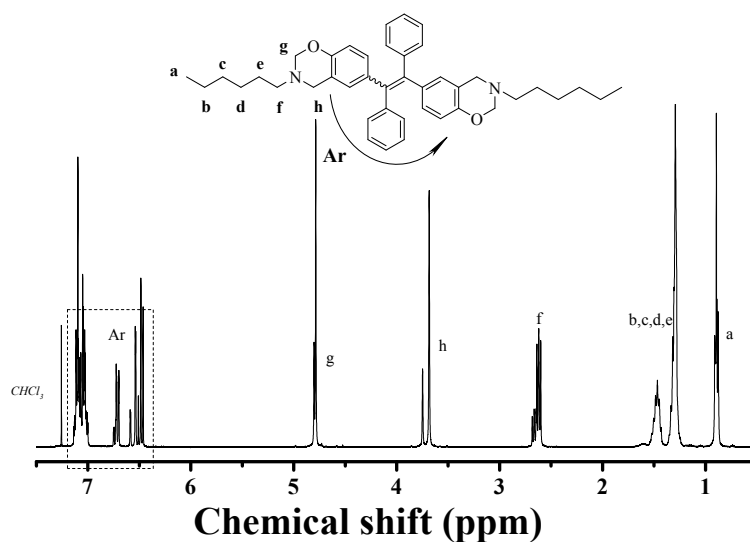**Fig. S1** <sup>1</sup>H NMR spectrum of **M3** in CDCl<sub>3</sub>.

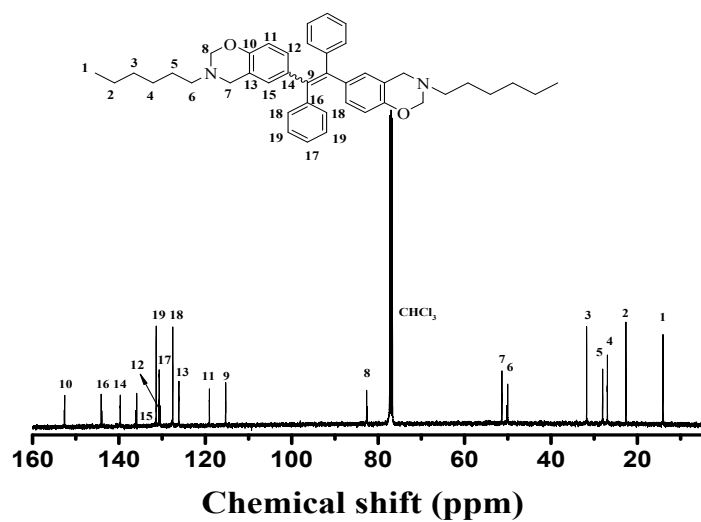

Fig. S2  $^{13}\text{C}$  NMR spectrum of M3 in  $\text{CDCl}_3$ .

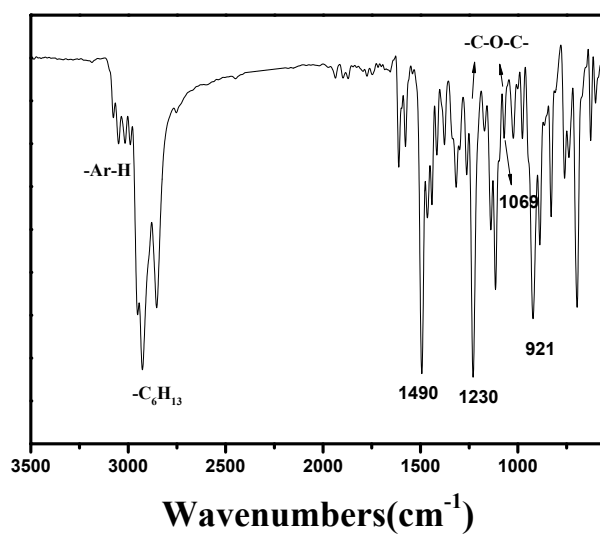

Fig. S3 FT-IR spectrum of M3.

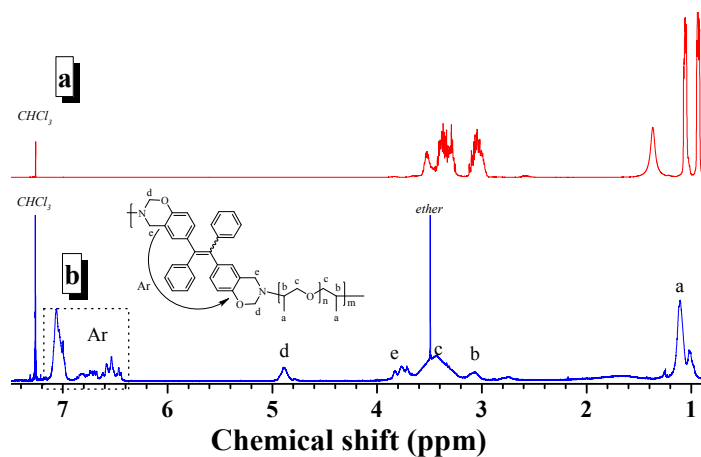

Fig. S4  $^1\text{H}$  NMR spectra of PEA (a) and TPE-BOZ (b) in  $\text{CDCl}_3$ .

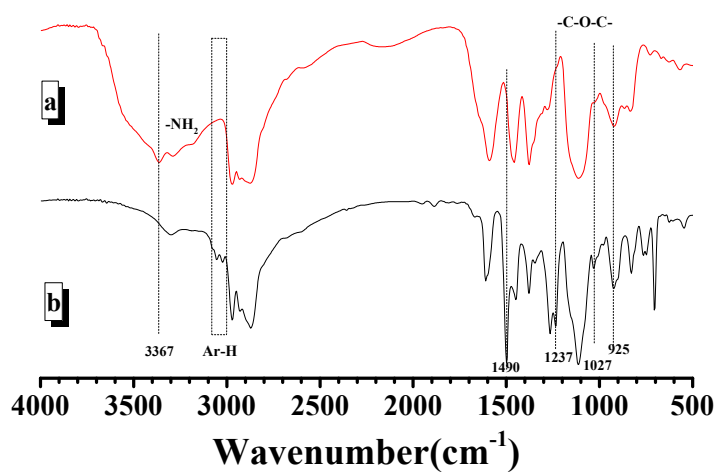

Fig. S5 FT-IR spectra of PEA (a) and TPE-BOZ (b).

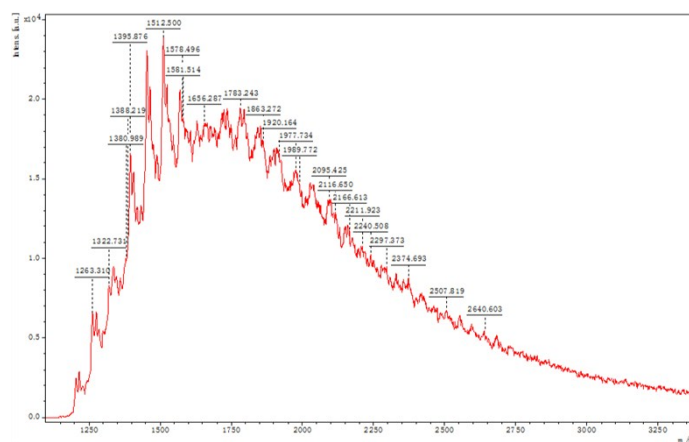

Fig. S6 TOF-MS of TPE-BOZ.

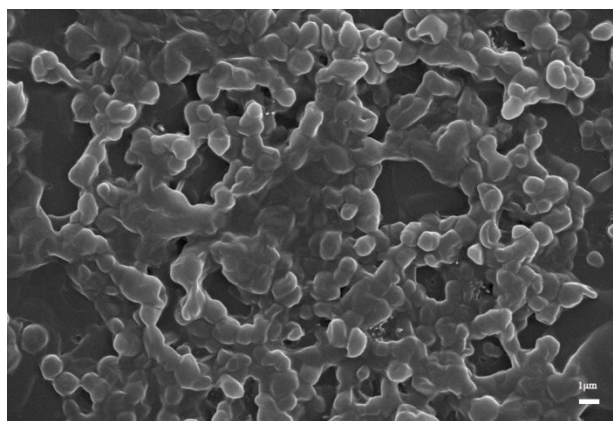

**Fig. S7** SEM of TPE-BOZ ( $1 \times 10^{-5}$  M) in ETOH/water (v/v=1/9) co-solvent system.

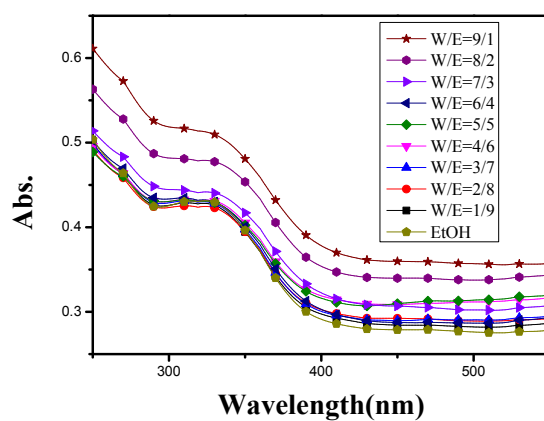

**Fig. S8** UV spectra of TPE-BOZ ( $1.0 \times 10^{-5}$  M) in EtOH/water mixtures with different fractions of water.

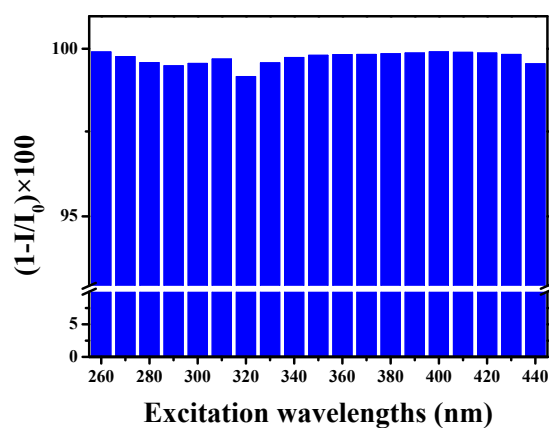

**Fig. S9** Fluorescence quenching of TPE-BOZ by PA under different  $\lambda_{ex}$ .

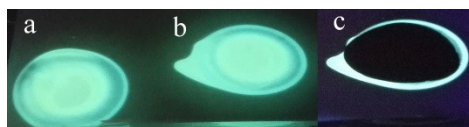

**Fig. S10** Visual photographs of **TPE-BOZ** adsorbed on a TLC plate (a) and with a spot of water (b) and PA solution ( $10^{-3}\text{M}$ ) (c) under hand-held UV lamp (365 nm).
